# Supplementary material for: Analysis of the Piezoelectric Properties of Aligned Multi-Walled Carbon Nanotubes
Source: MDPI journal article supplement (doi:10.3390/nano11112912), 2021-10-30
Supplement: s1 [file s1]

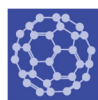

# Analysis of the Piezoelectric Properties of Aligned Multi-Walled Carbon Nanotubes

Marina V. Il'ina <sup>1,\*</sup>, Oleg I. Il'in <sup>2</sup>, Nikolay N. Rudyk <sup>2</sup>, Olga I. Osotova <sup>2</sup> and Alexander A. Fedotov <sup>1</sup> and Oleg A. Ageev <sup>1,3</sup>

<sup>1</sup> Institute of Nanotechnologies, Electronics and Electronic Equipment Engineering, Southern Federal University, 347922 Taganrog, Russia; aafedotov@sfedu.ru (A.A.F.); ageev@sfedu.ru (O.A.A.)

<sup>2</sup> Research Laboratory of Functional Nanomaterials Technology, Southern Federal University, 347922 Taganrog, Russia; oiilin@sfedu.ru (O.I.I.); nnrudyk@sfedu.ru (N.N.R.); osotova@sfedu.ru (O.I.O.)

<sup>3</sup> Research and Education Center "Nanotechnologies", Southern Federal University, Taganrog 347922, Russia

\* Correspondence: mailina@sfedu.ru

As we noted before, the occurrence of an elastic strain  $\Delta L$  in the carbon nanotube will lead to the formation of an internal field strength  $E_{def}$  associated with the manifestation of

piezoelectric effect. According to the theory of the piezoelectric effect, the internal field value  $E_{def}$  can be estimated as:

$$E_{def} = \frac{e}{\varepsilon_0 \varepsilon_{||}} \frac{\Delta L}{L} \quad (1)$$

where  $\varepsilon_{||}$  is the longitudinal dielectric constant of a CNT;  $e = \sigma/E$  is the piezoelectric coefficient, and  $\sigma$  is the mechanical stress of the CNT. Under the condition of the formation of tensile deformation, the positive piezoelectric charges are focused on the nanotube top and an internal field strength  $E_{def}$  is directed from the top to the bottom of the nanotube.

When a sawtooth voltage pulse is applied to a strained CNT, a redistribution of deformation  $\Delta L$  and the corresponding internal electric field  $E_{def}$  is observed under the action of the inverse piezoelectric effect. In the region of the current–voltage characteristic (CVC) from  $-3$  to  $3$  V, an additional compressive strain arises ( $\Delta L(t) = \Delta L - \Delta L'(t)$ ) and the value of the corresponding initial internal field  $E_{def}(t)$  decreases. As a result, the resistance of the nanotube decreases and corresponds to the low-resistance state  $R_{LR}$ .

At the time  $t = t_0$  ( $U = 3$  V), there is a jump of  $dU/dt$  and the relaxation of excessive stress. As a result, there is a hysteresis, the area of which is determined by the value of the oppositely directed current density [29]:

$$i(t_0) = (E(t_0) + E_{def}(t_0)) \frac{L \varepsilon_0 \varepsilon_{||}}{U(t_0)} \frac{dE(t)}{dt} - \frac{\Delta L(t)}{U_{piezo}} \frac{d\sigma(t)}{dt} \quad (2)$$

where  $U_{piezo}$  is the potential corresponding to the strain  $\Delta L$ . As a result, the nanotube switches into a high-resistance state, with resistance  $R(t)$  being proportional to the strain  $\Delta L(t) = \Delta L + \Delta L'(t_0)$ .

In region from  $3$  to  $-3$  V of the CVC, the internal field  $E_{def}(t)$  increases due to additional strain  $\Delta L(t) = \Delta L + \Delta L'(t)$  and partially compensates for the external field  $E(t)$ . At  $U(t) \rightarrow 0$ , the strain  $\Delta L'(t)$  tends to zero and the resistance is determined by the initial strain  $\Delta L$  of the nanotube.

Thus, the redistribution of strain and piezoelectric charge leads to hysteresis in the current–voltage characteristics and the appearance of memristive switching of the strained carbon nanotube.

**Citation:** Il'ina, M.V.; Il'in, O.I.; Rudyk, N.N.; Osotova, O.I.; Fedotov, A.A. Analysis of the Piezoelectric Properties of Aligned Multi-Walled Carbon Nanotubes. *Nanomaterials* **2021**, *11*, 2912.  
<https://doi.org/10.3390/nano11112912>

Academic Editor: Marianna V. Kharlamova

Received: 7 September 2021

Accepted: 26 October 2021

Published: 30 October 2021

**Publisher's Note:** MDPI stays neutral with regard to jurisdictional claims in published maps and institutional affiliations.

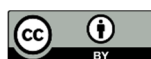

**Copyright:** © 2021 by the authors. Licensee MDPI, Basel, Switzerland. This article is an open access article distributed under the terms and conditions of the Creative Commons Attribution (CC BY) license (<http://creativecommons.org/licenses/by/4.0/>).
